# Supplementary material
Source: ML conference proceedings conference paper supplement (https://www.ecva.net/papers/eccv_2022/papers_ECCV/html/136810602_ECCV_2022_paper.php)
Supplement: Supplementary file 3 [file 136810602-supp.zip]

Archive with 14 entries (12 files):
- 5297-supp/
- __MACOSX/._5297-supp
- 5297-supp/.DS_Store
- __MACOSX/5297-supp/._.DS_Store
- 5297-supp/videos/
- 5297-supp/5297-supp.pdf
- __MACOSX/5297-supp/._5297-supp.pdf
- 5297-supp/videos/BMP2_FGF2.mp4
- __MACOSX/5297-supp/videos/._BMP2_FGF2.mp4
- 5297-supp/videos/FGF2.mp4
- 5297-supp/videos/BMP2.mp4
- 5297-supp/videos/control.mp4
- 5297-supp/videos/Readme.txt
- __MACOSX/5297-supp/videos/._Readme.txt
