# Supplementary material
Source: ML conference proceedings conference paper supplement (https://www.ecva.net/papers/eccv_2022/papers_ECCV/html/136810602_ECCV_2022_paper.php)
Supplement: Supplementary file 3 [file 136810602-supp.zip › 5297-supp/videos/Readme.txt]

In case you can not play the videos with your default media player, please try VLC media player.
